# Supplementary material for: Odontogenic Cervicofacial Necrotizing Fasciitis: Microbiological Characterization and Management of Four Clinical Cases
Source: MDPI journal article supplement (doi:10.3390/pathogens11010078), 2022-01-09
Supplement: s1 [file s1]

## Supplementary Material

**Table S1.** Relative abundances of the bacterial genera in the microbiome of Necrotizing Fasciitis.

| Genus.                              | Pat. No. 2 | Pat. No. 3 | Pat. No. 4 | Mean    |
|-------------------------------------|------------|------------|------------|---------|
| <i>Prevotella</i>                   | 11.5017    | 6.4085     | 46.7153    | 21.5418 |
| <i>Porphyromonas</i>                | 16.4081    | 25.7687    | 0.0092     | 14.0620 |
| <i>Peptostreptococcus</i>           | 14.8501    | 6.3073     | 8.1825     | 9.7800  |
| <i>Parvimonas</i>                   | 10.1047    | 2.3329     | 3.0086     | 5.1487  |
| <i>Erysipelothrix</i>               | 13.9398    | 0.0000     | 0.5520     | 4.8306  |
| <i>Coriobacterium</i>               | 0.8435     | 0.0000     | 12.8167    | 4.5534  |
| <i>Pyramidobacter</i>               | 0.0009     | 13.5196    | 0.0000     | 4.5068  |
| <i>Veillonella</i>                  | 1.1946     | 4.0980     | 7.9985     | 4.4304  |
| <i>Fusobacterium</i>                | 5.4298     | 0.0000     | 6.5724     | 4.0007  |
| <i>Moryella</i>                     | 0.0000     | 9.9162     | 0.0000     | 3.3054  |
| <i>Slackia</i>                      | 6.3279     | 0.2305     | 1.7175     | 2.7586  |
| <i>Peptoniphilus</i>                | 0.0000     | 6.2173     | 0.0000     | 2.0724  |
| <i>Oceanivirga</i>                  | 0.0000     | 5.9812     | 0.0000     | 1.9937  |
| <i>Atopobium</i>                    | 3.7758     | 1.6190     | 0.0000     | 1.7983  |
| <i>Lachnospira</i>                  | 0.8614     | 0.3485     | 3.6128     | 1.6076  |
| <i>Ezakiella</i>                    | 0.0000     | 4.3679     | 0.0000     | 1.4560  |
| <i>Mogibacterium</i>                | 3.3645     | 0.0000     | 0.9569     | 1.4405  |
| <i>Bacteroides</i>                  | 0.0715     | 3.9463     | 0.0061     | 1.3413  |
| <i>Filifactor</i>                   | 3.2731     | 0.0000     | 0.0000     | 1.0910  |
| <i>Eubacterium</i>                  | 1.2031     | 0.2136     | 1.6469     | 1.0212  |
| <i>Alloprevotella</i>               | 0.0047     | 0.0000     | 2.5915     | 0.8654  |
| <i>Oribacterium</i>                 | 0.0047     | 2.4228     | 0.0000     | 0.8092  |
| <i>Dialister</i>                    | 0.0038     | 0.0000     | 2.2818     | 0.7619  |
| <i>Streptococcus</i>                | 0.2052     | 0.0000     | 1.1777     | 0.4610  |
| <i>Treponema</i>                    | 1.2756     | 0.0000     | 0.0031     | 0.4262  |
| <i>Olsenella</i>                    | 0.0038     | 1.2704     | 0.0000     | 0.4247  |
| <i>Family_XIII_ge</i>               | 1.2228     | 0.0000     | 0.0000     | 0.4076  |
| <i>DNF00809</i>                     | 0.0000     | 1.1580     | 0.0000     | 0.3860  |
| <i>Corynebacterium</i>              | 1.0694     | 0.0000     | 0.0000     | 0.3565  |
| <i>Rikenella</i>                    | 1.0477     | 0.0000     | 0.0000     | 0.3492  |
| <i>Selenomonas</i>                  | 0.9809     | 0.0000     | 0.0215     | 0.3341  |
| <i>Prevotella_7</i>                 | 0.0000     | 0.7982     | 0.0000     | 0.2661  |
| <i>Solobacterium</i>                | 0.0000     | 0.6127     | 0.0000     | 0.2042  |
| <i>Actinomyces</i>                  | 0.0028     | 0.4666     | 0.0000     | 0.1565  |
| <i>Catonella</i>                    | 0.4255     | 0.0000     | 0.0000     | 0.1418  |
| <i>Lachnospiraceae FE2018 group</i> | 0.0000     | 0.4104     | 0.0000     | 0.1368  |
| <i>Peptococcus</i>                  | 0.3427     | 0.0675     | 0.0000     | 0.1367  |
| <i>Eggerthia</i>                    | 0.0000     | 0.3092     | 0.0000     | 0.1031  |
| <i>Candidatus Saccharimonas</i>     | 0.0000     | 0.2811     | 0.0000     | 0.0937  |
| <i>Rikenellaceae RC9 gut group</i>  | 0.0000     | 0.2530     | 0.0000     | 0.0843  |
| <i>Sphaerochaeta</i>                | 0.0000     | 0.2080     | 0.0000     | 0.0693  |
| <i>Gemella</i>                      | 0.1845     | 0.0000     | 0.0061     | 0.0635  |
| <i>Escherichia-Shigella</i>         | 0.0000     | 0.1518     | 0.0000     | 0.0506  |
| <i>Finegoldia</i>                   | 0.0000     | 0.1349     | 0.0000     | 0.0450  |
| <i>Neisseria</i>                    | 0.0038     | 0.0843     | 0.0092     | 0.0324  |
| <i>Family XIII AD3011 group</i>     | 0.0000     | 0.0787     | 0.0000     | 0.0262  |
| <i>Mycoplasma</i>                   | 0.0000     | 0.0000     | 0.0644     | 0.0215  |
| <i>Campylobacter</i>                | 0.0235     | 0.0000     | 0.0000     | 0.0078  |
| <i>Rothia</i>                       | 0.0000     | 0.0000     | 0.0184     | 0.0061  |
| <i>Anaerococcus</i>                 | 0.0000     | 0.0169     | 0.0000     | 0.0056  |
| <i>Lactobacillus</i>                | 0.0038     | 0.0000     | 0.0123     | 0.0054  |

|                                      |        |        |        |        |
|--------------------------------------|--------|--------|--------|--------|
| <i>Fretibacterium</i>                | 0.0038 | 0.0000 | 0.0061 | 0.0033 |
| <i>Staphylococcus</i>                | 0.0038 | 0.0000 | 0.0031 | 0.0023 |
| <i>Clostridium</i>                   | 0.0066 | 0.0000 | 0.0000 | 0.0022 |
| <i>Moraxella</i>                     | 0.0038 | 0.0000 | 0.0000 | 0.0013 |
| <i>Listeria</i>                      | 0.0038 | 0.0000 | 0.0000 | 0.0013 |
| <i>Ruminococcus</i>                  | 0.0038 | 0.0000 | 0.0000 | 0.0013 |
| <i>Acidibacter</i>                   | 0.0038 | 0.0000 | 0.0000 | 0.0013 |
| <i>Bifidobacterium</i>               | 0.0000 | 0.0000 | 0.0031 | 0.0010 |
| <i>Haemophilus</i>                   | 0.0000 | 0.0000 | 0.0031 | 0.0010 |
| <i>Clostridiales bacterium</i>       | 0.0000 | 0.0000 | 0.0031 | 0.0010 |
| <i>Enterococcus</i>                  | 0.0028 | 0.0000 | 0.0000 | 0.0009 |
| <i>Acinetobacter</i>                 | 0.0019 | 0.0000 | 0.0000 | 0.0006 |
| <i>Pseudomonas</i>                   | 0.0019 | 0.0000 | 0.0000 | 0.0006 |
| <i>Pasteurella</i>                   | 0.0019 | 0.0000 | 0.0000 | 0.0006 |
| <i>Defluviitaleaceae_UCG-012</i>     | 0.0019 | 0.0000 | 0.0000 | 0.0006 |
| <i>Burkholderia-Paraburkholderia</i> | 0.0019 | 0.0000 | 0.0000 | 0.0006 |
| <i>Bradyrhizobium</i>                | 0.0009 | 0.0000 | 0.0000 | 0.0003 |
| <i>Comamonas</i>                     | 0.0009 | 0.0000 | 0.0000 | 0.0003 |
| <i>Howardella</i>                    | 0.0009 | 0.0000 | 0.0000 | 0.0003 |
